# Supplementary material for: Policy Brief No. 34. The Malawi Agricultural Input Subsidy Programme: Lessons from Research Findings, 2005 – 2008
Source: Springer Nature journal article supplement (doi:10.1186/s12979-017-0092-5), 2010-01-01

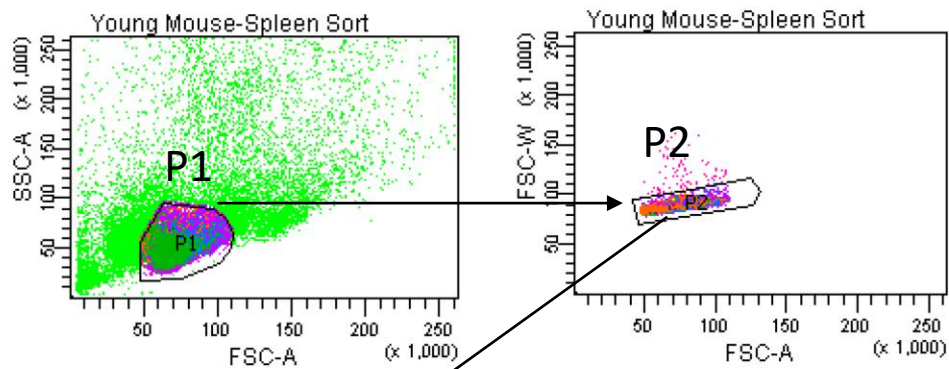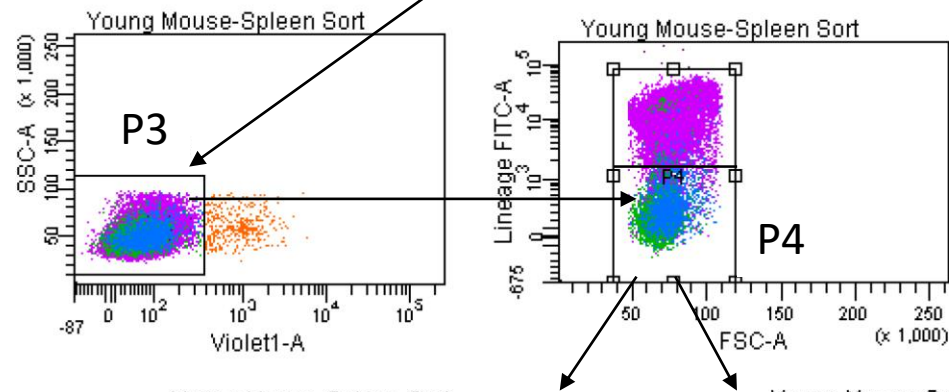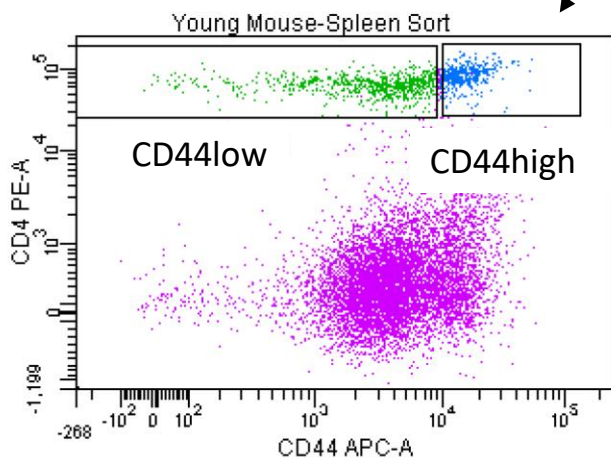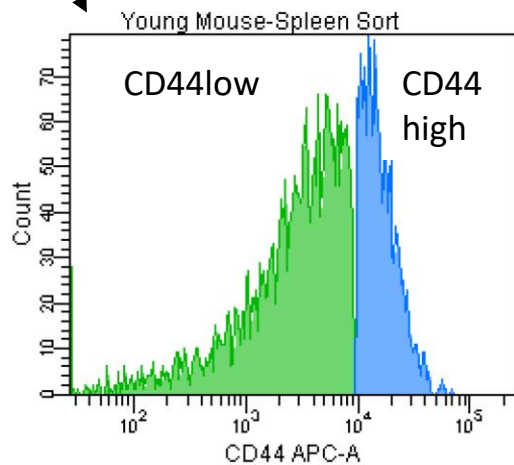

Supplement: MOESM1 [file 12458404]
